# Supplementary material
Source: PubMed Central journal article supplement (PMC3666702)
Supplement: 1218270110_pnas.201218270SI.pdf [file 1218270110_pnas.201218270SI.pdf]

# Supporting Information

Cleary et al. 10.1073/pnas.1218270110

## SI Materials and Methods

**Model of  $N$ -Fold Geometry.** To study the effect of the fold symmetry on the optimal rotational configuration we construct a model  $N$ -fold geometry. The configuration of each heterodimer is independent of the fold number  $N$ , so that we may fix the  $\alpha\beta$ -heterodimer structure (1). As indicated in Fig. S1, this subunit of light-harvesting complex 2 (LH2) consists of two B850 bacterichlorophylls (BChls). Between the two B850 BChls within the heterodimer the Mg–Mg distance is set to  $a = 9.45$  Å, whereas between the nearest BChls of neighboring heterodimers, the Mg–Mg distance is set to  $b = 9.01$  Å. The orientations of the heterodimer's transition dipole moments, taken with relation to the Mg–Mg vector within the heterodimer, are  $\theta_\alpha = 168.63^\circ$  and  $\theta_\beta = -21.06^\circ$ . We have obtained these values from the LH2 B850 ring structure of *Rhodospseudomonas acidophila* (Protein Data Bank ID 1NKZ).

Next, we assume that an  $N$ -fold ring may be constructed by mapping this fixed-structure heterodimer  $N$  times around a single circumference. Due to this constraint, both the radius,  $R$ , and the angle,  $\alpha$ , subtended at the origin by the cord  $a$ , are explicit functions of the fold number  $N$  and heterodimer constants  $a$  and  $b$ . From Fig. S1, we obtain the relations

$$R \sin(\alpha/2) = a/2,$$

$$R \sin[(2\pi/N - \alpha)/2] = b/2.$$

Solving the above simultaneous equations yields

$$\alpha = 2 \sin^{-1}(a/2R),$$

and

$$R = \frac{\sqrt{a^2 + b^2 + 2ab \cos(\pi/N)}}{2 \sin(\pi/N)}. \quad [\text{S1}]$$

Eq. S1 is the radius of the  $N$ -fold B850 ring subject to the constraints of a fixed dimer structure aligned upon a single circumference. For  $N = 8$  and  $N = 9$  Eq. S1 yields radii of 23.67 Å and 26.59 Å, which compare favorably with the radii of *Rhodospirillum molischianum* and *Rps. acidophila*, 23.4 Å and 26.37 Å, respectively.

**Model Hamiltonian.** In the site basis, the system Hamiltonian of a single B850 ring with  $N$ -fold symmetry is (2)

$$H = \sum_{n=1}^{2N} E_n |n\rangle\langle n| + \sum_{n \neq n'}^{2N} V_{nn'} |n\rangle\langle n'|, \quad [\text{S2}]$$

where  $|n\rangle$  represents the state where only the  $n$ th chromophore is in its excited state and all others are in their ground states (3).  $E_n$  is the site energy of the  $n$ th chromophore, defined as the optical transition energy at the equilibrium configuration of environmental phonons associated with the ground state.  $V_{nn'}$  denotes the electronic coupling between the  $n$ th and the  $n'$ th chromophores and is responsible for migration of electronic excitation within the complex. The non-nearest-neighbor coupling terms are calculated using the dipole–dipole approximation  $V_{nn'} = C[(\vec{d}_n \cdot \vec{d}_{n'})/|\vec{r}_{nn'}|^3 - 3(\vec{r}_{nn'} \cdot \vec{d}_n)(\vec{r}_{nn'} \cdot \vec{d}_{n'})/|\vec{r}_{nn'}|^5]$ , where  $\vec{d}_n = \langle 0|\hat{\mu}|n\rangle$  is a unit vector describing the direction of the dipole moment of the ground state

$|0\rangle$  to the  $Q_y$  excited state transition of the  $n$ th chromophore,  $\hat{\mu}$  is the dipole operator,  $\vec{r}_{nn'}$  is the vector connecting the centers of chromophore  $n$  and chromophore  $n'$ , and  $C$  is an appropriate, dimensioned constant. The following values are used throughout: the site energy  $E_n = 12480$  cm<sup>-1</sup>, the intradimer coupling  $V_{2n-1,2n} = V_{2n,2n-1} = 363$  cm<sup>-1</sup> ( $n = 1, \dots, N$ ), the interdimer coupling  $V_{2n+1,2n} = V_{2n,2n+1} = V_{1,2N} = V_{2N,1} = 320$  cm<sup>-1</sup> ( $n = 1, \dots, N-1$ ), and the dimensioned constant  $C = 348,000$  Å<sup>3</sup>·cm<sup>-1</sup> (4, 5). Note that we have neglected the dependence of the interdimer coupling on the fold number  $N$  (due to the changing orientations of the neighboring transition dipole vectors). This is of no consequence to our results and conclusions.

An important property of  $N$ -fold symmetric ring structures is the existence of  $N-2$  and  $N-1$  pairs of degenerate eigenstates for even and odd  $N$ , respectively (6). Consider the dimeric ( $N$ -fold) structure of the B850 ring. One can introduce the column vector  $|p\rangle$  of local states

$$|p\rangle = \begin{pmatrix} |2p-1\rangle \\ |2p\rangle \end{pmatrix}, \quad [\text{S3}]$$

where  $p = 1, 2, \dots, N$ , and the  $2 \times 2$  matrix of coupling terms

$$H_{qp} = \begin{pmatrix} V_{2q-1,2p-1} & V_{2q-1,2p} \\ V_{2q,2p-1} & V_{2q,2p} \end{pmatrix}, \quad [\text{S4}]$$

with  $V_{qq} = E_q$ , so that the Hamiltonian Eq. S2 may be written  $H = \sum_{q,p} H_{qp} |q\rangle\langle p|$ . Due to the periodicity of the ring, the eigenvector coefficients of this Hamiltonian are simply the Fourier coefficients, i.e., ref. 6,

$$|k\rangle = \frac{1}{\sqrt{N}} \sum_{p=1}^N e^{ik(2\pi p/N)} |p\rangle, \quad [\text{S5}]$$

where  $k = 1, 2, \dots, N$ . The corresponding eigenvalues are

$$\begin{aligned} \langle\langle k|H|k\rangle\rangle &= \frac{1}{N} \sum_{q=1, p=1}^N e^{ik2\pi(p-q)/N} H_{qp} \\ &= \sum_{p=2}^N e^{ik2\pi(p-1)/N} H_{1p}. \end{aligned} \quad [\text{S6}]$$

According to Eq. S6, when  $N$  is even, there are two nondegenerate states  $k = N/2$  and  $k = N$  as well as  $(N-2)/2$  pairs of degenerate states  $k = j$  and  $k = N-j$ , [ $j = 1, 2, \dots, (N/2-1)$ ]. For odd  $N$ , the spectrum consists of only one nondegenerate state,  $k = N$ , and  $(N-1)/2$  pairs of degenerate states,  $k = j$  and  $k = N-j$ , [ $j = 1, 2, \dots, (N-1)/2$ ]. However, the above analysis is for the “monomer” case. Each LH2 site is a dimer. Thus, diagonalization of each dimer-Hamiltonian  $H_{1p}$  yields an eigenenergy splitting, which gives rise to two subeigenenergies. As a result, we get  $2 \times 2 = 4$  nondegenerate states and  $2 \times (N-2)/2 = N-2$  pairs of degenerate states for even  $N$ , as well as  $2 \times 1 = 2$  nondegenerate states and  $2 \times (N-1)/2 = N-1$  pairs of degenerate states for odd  $N$ . For example, for  $N = 8$  diagonalization of the Hamiltonian (2) yields four nondegenerate eigenstates  $|\epsilon_1\rangle, |\epsilon_8\rangle, |\epsilon_9\rangle$ , and  $|\epsilon_{16}\rangle$ , as well as six pairs of degenerate eigenstates. Similarly, a fold number of  $N = 9$  yields two nondegenerate

eigenstates  $|\varepsilon_1\rangle$  and  $|\varepsilon_{18}\rangle$ , as well as eight pairs of degenerate eigenstates. From this analysis, it is clear that the eigenenergy structure of an LH2 B850 ring is decided by the fold symmetry number  $N$  arising from the dimeric structure of the ring.

**Mirror Symmetry Lines of Two  $N$ -Fold Rings.** The excitation energy transfer (EET) rate between two  $N$ -fold rings as a function of the rotation angles,  $|J_{12}^2| \equiv F(\theta_1, \theta_2)$ , displays mirror symmetry lines at  $\theta_1 = \theta_2 \pm \pi/9$  for  $N = 9$  and a symmetry line at  $\theta_1 = \theta_2$  for  $N = 8$  (dashed lines in Fig. 3A and Fig. S3A, respectively). Using a simple geometrical argument, we prove that the phase shift of the mirror symmetry lines  $\phi_N = \theta_1 - \theta_2 + 2\pi p/N$ , ( $p \in \mathbb{Z}$ ) for any  $N$  is

$$\phi_N = \begin{cases} \pi/N & N \text{ odd,} \\ 0 & N \text{ even.} \end{cases} \quad [\text{S7}]$$

For odd fold numbers, consider the EET rate between two three-fold rings. As shown in Fig. S2A, the initial rotational configu-

ration is given by  $(\theta_1, \theta_2)$ . If we rotate the whole system by  $180^\circ$  ( $C_2$  rotation) about the point  $O$ , it is easy to see that the new configuration in Fig. S2B is given by  $(\theta_2 + \pi, \theta_1 + \pi)$ . However, the EET rate  $F(\theta_1, \theta_2)$  between the two rings is invariant under  $C_2$  rotation of the whole system. Hence we have

$$F(\theta_1, \theta_2) = F(\theta_2 + \pi, \theta_1 + \pi), \\ = F(\theta_2 + \pi/3, \theta_1 + \pi/3),$$

where the second relation follows from the  $2\pi/3$  periodicity of the individual rings. We thus have identified the point  $(\theta_1, \theta_2)$  with  $(\theta_2 + \pi/3, \theta_1 + \pi/3)$  on the EET landscape  $F$ . This is exactly equivalent to having mirror symmetry lines at  $\theta_1 = \theta_2 \pm \pi/3$ . This argument is easily generalized to any odd  $N$ , providing a simple proof of Eq. S7 for  $N$  odd.

For even fold numbers, because  $\pi$  is always evenly divisible by the ring's periodicity  $2\pi/N$ , one obtains the result  $F(\theta_1, \theta_2) = F(\theta_2 + \pi, \theta_1 + \pi) = F(\theta_2, \theta_1)$  so that the mirror symmetry line is  $\theta_1 = \theta_2$ . This provides proof of Eq. S7 for  $N$  even.

1. Janosi L, Keer H, Kosztin I, Ritz T (2006) Influence of subunit structure on the oligomerization state of light-harvesting complexes: A free energy calculation study. *Chem Phys* 323(1):117–128.
2. Davydov AS (1962) *Theory of Molecular Excitons* (Plenum, New York).
3. Renger T, May V, Kühn O (2001) Ultrafast excitation energy transfer dynamics in photosynthetic pigment–protein complexes. *Phys Rep* 343:137–254.

4. Hu X, Ritz T, Damjanović A, Schulten K (1997) Pigment organization and transfer of electronic excitation in the photosynthetic unit of purple bacteria. *J Phys Chem B* 101(19):3854–3871.
5. Strümpfer J, Schulten K (2009) Light harvesting complex II B850 excitation dynamics. *J Chem Phys* 131(22):225101.
6. Hochstrasser RM (1966) *Molecular Aspects of Symmetry* (W A Benjamin, New York).

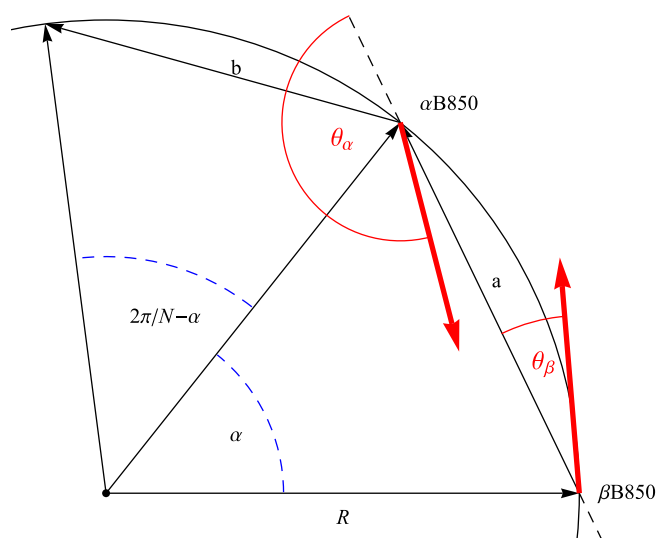

**Fig. S1.** Model of  $N$ -fold geometry. The structure of a single  $\alpha\beta$ -heterodimer subunit is fixed by specifying the intradimer Mg–Mg distance  $a = 9.45 \text{ \AA}$  and interdimer Mg–Mg distance  $b = 9.01 \text{ \AA}$ . The orientations of the transition dipole moments are  $\theta_\alpha = 168.63^\circ$  and  $\theta_\beta = -21.06^\circ$ . The radius  $R$  and angle  $\alpha$  are explicit functions of the fold number  $N$  and constants  $a$  and  $b$ .
